# Supplementary material for: Infants’ Somatotopic Neural Responses to Seeing Human Actions: I’ve Got You under My Skin
Source: PubMed Central journal article supplement (PMC3813772; doi:10.1371/journal.pone.0077905), 2013-10-30
Supplement: pone.0077905.s001.pdf [file pone.0077905.s001.pdf]

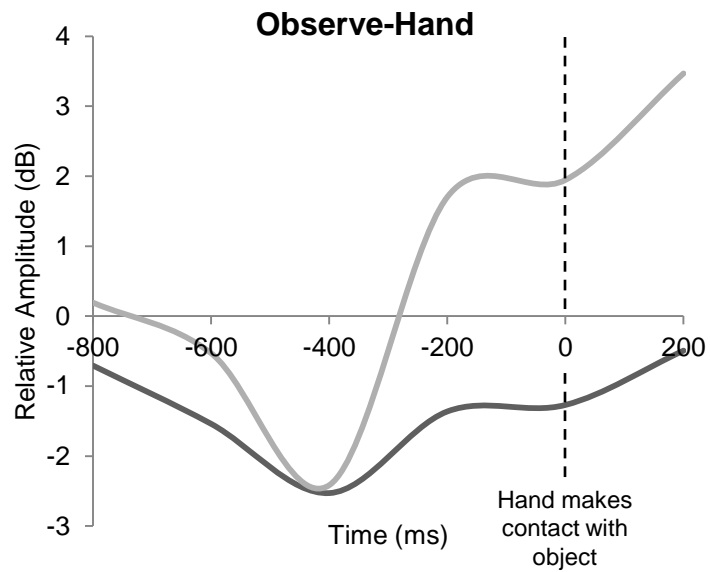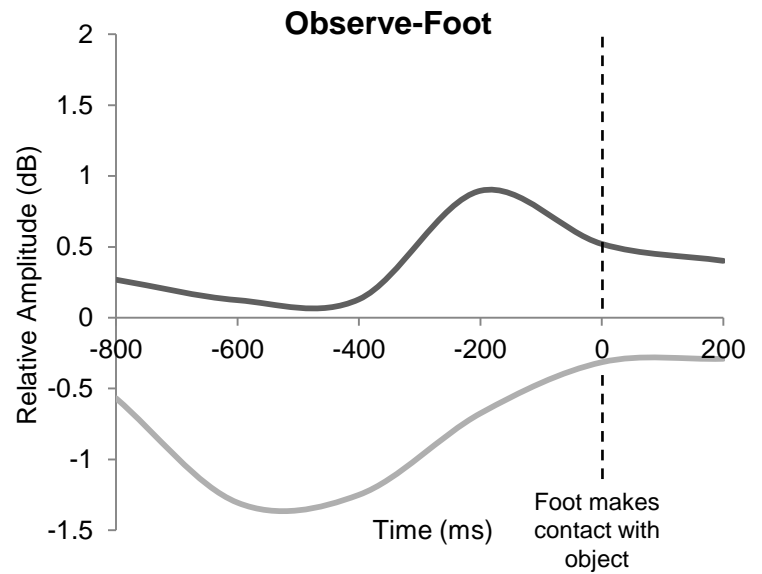

— Hand area (C3/C4) — Foot area (Cz)
